# Supplementary material
Source: Elsevier journal article supplement (https://www.sciencedirect.com/science/article/pii/S1885585715003539)
Supplement: mmc1 [file S1885585715003539:mmc1.pdf]

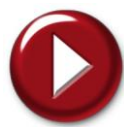

## Supplementary material

---

# Impact of the Everolimus-eluting Bioresorbable Scaffold in Coronary Atherosclerosis

Carlos M. Campos,<sup>a,b,c</sup> Hector M. Garcia-Garcia,<sup>a,\*</sup> Takashi Muramatsu,<sup>a,d</sup> Pedro de Araujo Goncalves,<sup>e,f,g</sup> Yoshinobu Onuma,<sup>a</sup> Dariusz Dudek,<sup>h</sup> Leif Thuesen,<sup>i</sup> Mark WI Webster,<sup>j</sup> Pieter Kitslaar,<sup>k,l</sup> Susan Veldhof,<sup>m</sup> Johan H. C. Reiber,<sup>k,l</sup> Koen Nieman,<sup>a,n</sup> John A. Ormiston,<sup>j</sup> and Patrick W. Serruys<sup>o</sup>

<sup>a</sup>*Department of Cardiology, Erasmus University Medical Centre, Thoraxcenter, Rotterdam, The Netherlands*

<sup>b</sup>*Heart Institute (InCor), University of São Paulo Medical School, Sao Paulo, Brazil*

<sup>c</sup>*Department of Interventional Cardiology, Hospital Israelita Albert Einstein, Sao Paulo, Brazil*

<sup>d</sup>*Department of Cardiology, Fujita Health University Hospital, Toyoake, Japan*

<sup>e</sup>*Cardiology Department, Hospital de Santa Cruz, CHLO, Lisbon, Portugal*

<sup>f</sup>*Hospital da Luz, Cardiovascular Center, ESS, Lisbon, Portugal*

<sup>g</sup>*CEDOC, Chronic Diseases Research Center, FCM-NOVA, Lisbon, Portugal*

<sup>h</sup>*Jagiellonian University, Krakow, Poland*

<sup>i</sup>*Department of Cardiology, Aarhus University Hospital, Skejby, Denmark*

<sup>j</sup>*Auckland City Hospital, Auckland, New Zealand*

<sup>k</sup>*Medis Medical Imaging Systems bv, Leiden, The Netherlands*

<sup>l</sup>*Division of Image Processing, Department of Radiology, Leiden University Medical Center, Leiden, The Netherlands*

<sup>m</sup>*Abbott, Vascular, Diegem, Belgium*

<sup>n</sup>*Department of Radiology, Thoraxcenter, Erasmus Medical Center, Rotterdam, the Netherlands*

<sup>o</sup>*International Centre for Circulatory Health, NHLI, Imperial College London, London, United Kingdom*

---

### Cluster Analysis

A K-mean cluster analysis was run using the segment name as a categorical variable and the change in percent atheroma volume (% PAV) as continuous variable. Two clusters were found, distributed as follows:

|                     |                                 | Segment name  |                 |               |                 |               |                 |          | Total  |
|---------------------|---------------------------------|---------------|-----------------|---------------|-----------------|---------------|-----------------|----------|--------|
|                     |                                 | LCX<br>distal | LCX<br>proximal | LAD<br>distal | LAD<br>proximal | RCA<br>distal | RCA<br>proximal | Scaffold |        |
| Cluster 1           | Count                           | 8             | 7               | 5             | 7               | 12            | 10              | 9        | 58     |
| Number              | % within cluster                | 13.8%         | 12.1%           | 8.6%          | 12.1%           | 20.7%         | 17.2%           | 15.5%    | 100.0% |
| Case number         | % within segment name           | 66.7%         | 53.8%           | 55.6%         | 77.8%           | 85.7%         | 71.4%           | 50.0%    | 65.2%  |
|                     | % of total                      | 9.0%          | 7.9%            | 5.6%          | 7.9%            | 13.5%         | 11.2%           | 10.1%    | 65.2%  |
| Cluster 2           | Count                           | 4             | 6               | 4             | 2               | 2             | 4               | 9        | 31     |
|                     | % within cluster                | 12.9%         | 19.4%           | 12.9%         | 6.5%            | 6.5%          | 12.9%           | 29.0%    | 100.0% |
| Case number of Case | % within segment name           | 33.3%         | 46.2%           | 44.4%         | 22.2%           | 14.3%         | 28.6%           | 50.0%    | 34.8%  |
|                     | % of total                      | 4.5%          | 6.7%            | 4.5%          | 2.2%            | 2.2%          | 4.5%            | 10.1%    | 34.8%  |
| Total               | Count                           | 12            | 13              | 9             | 9               | 14            | 14              | 18       | 89     |
|                     | % within cluster                | 13.5%         | 14.6%           | 10.1%         | 10.1%           | 15.7%         | 15.7%           | 20.2%    | 100.0% |
| Case number of      | % within 18 months.Segment_name | 100.0%        | 100.0%          | 100.0%        | 100.0%          | 100.0%        | 100.0%          | 100.0%   | 100.0% |
|                     | % of total                      | 13.5%         | 14.6%           | 10.1%         | 10.1%           | 15.7%         | 15.7%           | 20.2%    | 100.0% |

It can be noticed that in nonintervened segments, most segments were in cluster 1. Moreover, treated segments were divided equally between clusters 1 and 2. The most prevalent segments in cluster 2 were treated segments (29.0% of cluster 2 members).

LAD, left anterior descending coronary artery; LCX, left circumflex coronary artery; RCA, right coronary artery.

The changes in percent atheroma volume of the 2 clusters were the following:

|                                                         | Cluster Number | N  | Mean  | Standard deviation | Standard error of the mean | <i>P</i> |
|---------------------------------------------------------|----------------|----|-------|--------------------|----------------------------|----------|
| Percent atheroma volume at 18 –mo                       | 1              | 58 | 43.59 | 9.99               | 1.31                       | .010     |
|                                                         | 2              | 31 | 49.33 | 9.44               | 1.69                       |          |
| Percent atheroma volume at 60-mo                        | 1              | 58 | 49.42 | 11.01              | 1.44                       | .018     |
|                                                         | 2              | 31 | 43.88 | 8.89               | 1.59                       |          |
| Change in percent atheroma volume                       | 1              | 58 | 5.83  | 4.10               | 0.53                       | <.01     |
|                                                         | 2              | 31 | -5.45 | 4.78               | 0.85                       |          |
| Distance of case from its classification cluster center | 1              | 58 | 3.19  | 2.54               | 0.33                       | .16      |
|                                                         | 2              | 31 | 3.99  | 2.52               | 0.45                       |          |

Cluster 1 had a mean increase of  $5.83 \pm 4.10\%$  in %PAV while cluster 2 had a mean decrease of  $5.45 \pm 4.78\%$  in %PAV ( $P < .01$ ). The mean intracluster distance of case from its classification cluster center did not differ between the 2 groups ( $P = .16$ ).
